# Supplementary material for: Green synthesis of fluorescent hydrophobic carbon quantum dots and their use for 2,4,6-trinitrophenol detection
Source: Royal Society of Chemistry journal article supplement (doi:10.1039/c5ra19029k), 2015-01-01
Supplement: c5ra19029k1.pdf [file c5ra19029k1.pdf]

## Electronic Supporting Information

### Green synthesis of fluorescent hydrophobic carbon quantum dots and their use for 2,4,6-trinitrophenol detection

Fangliang Cheng, Xueqin An\*, Cui Zheng and Sisheng Cao

East China University of Science and Technology, 130 Meilong Road, Shanghai, 200237, China. E-mail: anxueqin@ecust.edu.cn; Fax: +86-21-64250804; Tel: +86-21-64250804

#### Experiment

**Titration method:** For example, detection of TNP at the existence of TNT. The initial fluorescence spectrum of HCDs dispersed in THF was recorded, to this was firstly added the TNT, but a very weak intensity change was observed upon TNT addition. Then, TNP solution (equal concentration and volume to TNT) was added to the TNT-containing solution, this resulted in significant fluorescence quenching. The trend was also repeated in the subsequent addition cycles and the quenching efficiency of TNP remained unaffected (Figure S2). Similar experiments for other nitro compounds were also performed.

**Particle size decided from the XRD data (Fig. S1):** The single broad peak at  $2\theta = 21.48^\circ$  in XRD pattern was fitted to get a value of FWHM was 0.077 rad. By using Scherrer equation ( $D = (K \times \gamma) / (B \times \cos\theta)$ ), K was 0.89,  $\gamma$  was 0.154 nm, the particle size was calculated to be 1.8 nm.

Supplementary figures and tables

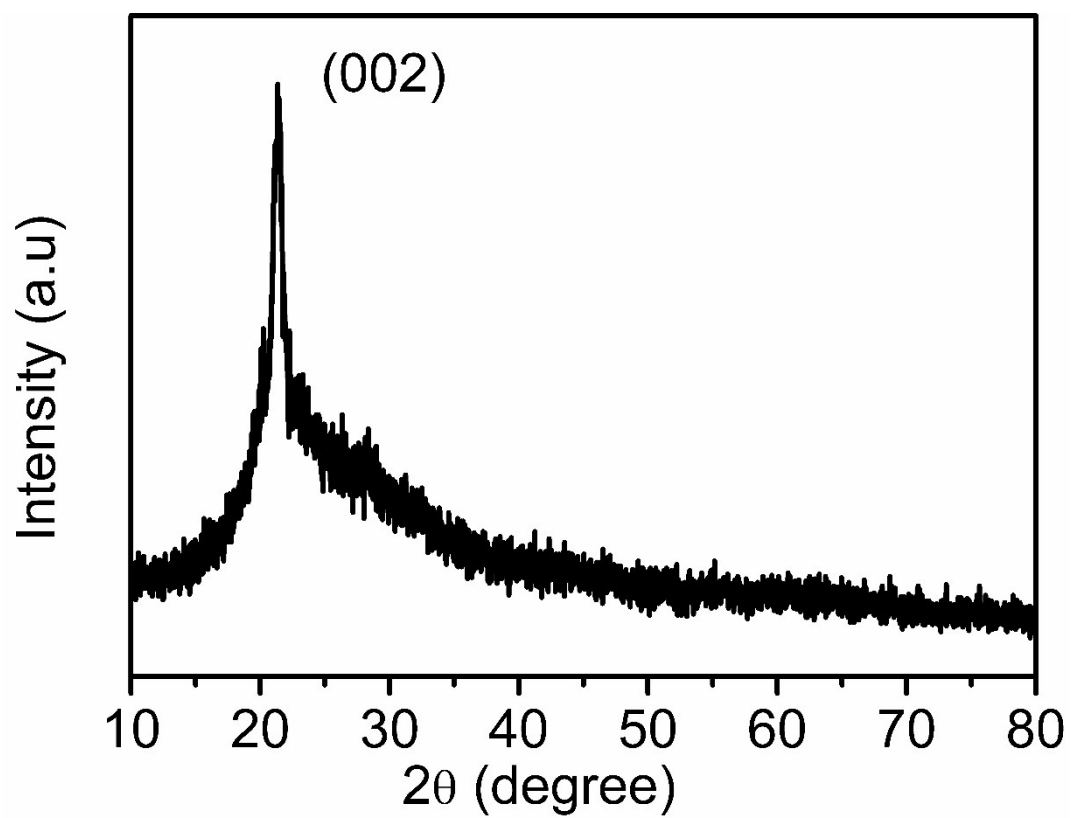

Fig. S1 XRD pattern of HCDs.

**Table S1** Comparison of different methods for the determination of TNP.

| Method                        | Media                         | Linear range       | Detection limit | Reference |
|-------------------------------|-------------------------------|--------------------|-----------------|-----------|
| N-GQDs                        | H <sub>2</sub> O              | 1-60 μM            | 0.30 μM         | 1         |
| Graphitic carbon nitride      | H <sub>2</sub> O              | 0-10 μM            | 8.2 nM          | 2         |
| Alq3-based nanosphere         | H <sub>2</sub> O              | 0.22-30 μM         | 0.14 μM         | 3         |
| MoS <sub>2</sub> quantum dots | H <sub>2</sub> O              | 0.099-36.5 μM      | 95 nM           | 4         |
| CDs                           | H <sub>2</sub> O              | 0-100 μM           | 22 nM           | 5         |
| Fluoranthene derivative       | Ethanol                       | Over 0-10 μM       | 0.09 μM         | 6         |
| Graphene derivative           | H <sub>2</sub> O/THF(v/v=9:1) | Bend up in 0-7 μM  | 1.31 μM         | 7         |
| Organic cage                  | DCM                           | Bend up in 0-24 μM | 0.03 μM         | 8         |
| HCDs                          | THF                           | 1-110 μM           | 1.8 μM          | This work |

**Table S2** Fluorescence quenching constant ( $K_{sv}$ ) and correlation values of different analytes.

| <b>Nitro aromatics</b> | $K_{sv}$          | <b>Correlation coefficient</b> |
|------------------------|-------------------|--------------------------------|
| <b>TNP</b>             | $2.6 \times 10^4$ | 0.995                          |
| <b>TNT</b>             | $1.9 \times 10^3$ | 0.996                          |
| <b>DNT</b>             | $1.0 \times 10^3$ | 0.975                          |
| <b>NT</b>              | $7.9 \times 10^2$ | 0.970                          |
| <b>NP</b>              | $7.6 \times 10^2$ | 0.969                          |
| <b>NB</b>              | $5.6 \times 10^2$ | 0.978                          |

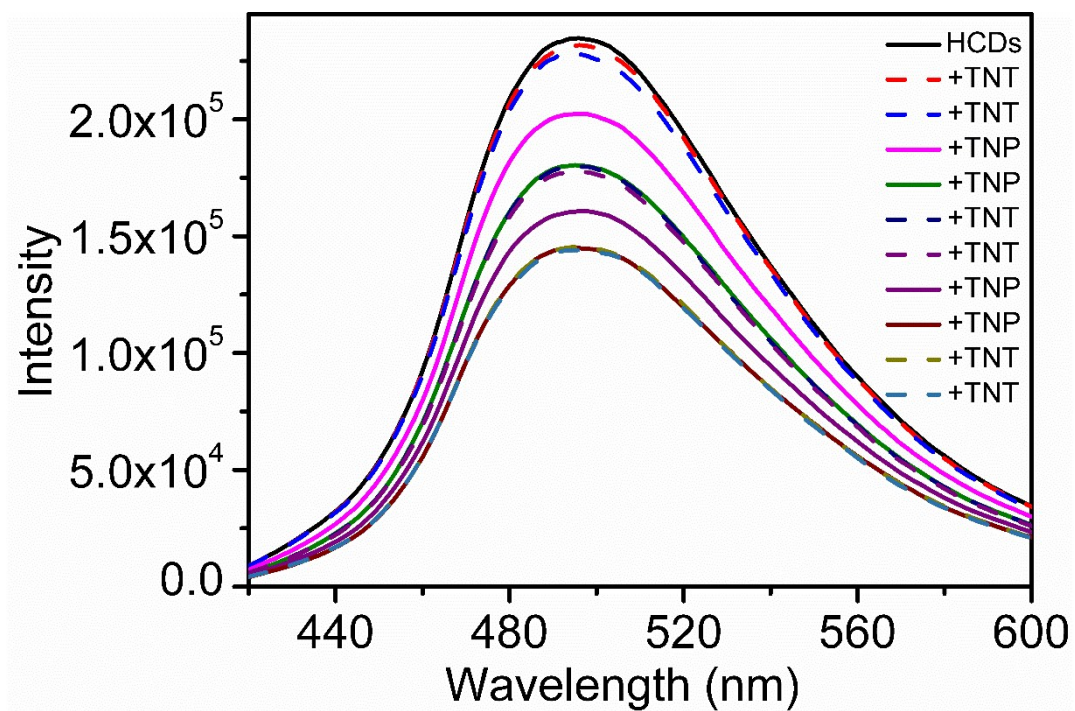

**Fig. S2** Emission spectrum of HCDs upon addition of the THF solution of TNT followed by TNP (dashed line for TNT added and solid line for TNP added).

**Table S3** The fluorescence lifetime decay fitting of the HCDs in different concentrations of TNP analysis.

| Sample                | $\tau_1$ (ns) | %     | $\tau_2$ (ns) | %     | $\chi^2$ | Lifetime (ns) |
|-----------------------|---------------|-------|---------------|-------|----------|---------------|
| HCDs                  | 3.34          | 18.24 | 9.91          | 81.76 | 1.027    | 9.45          |
| HCDs + 24 $\mu$ M TNP | 3.36          | 18.41 | 9.96          | 81.59 | 1.042    | 9.49          |
| HCDs + 48 $\mu$ M TNP | 3.15          | 16.66 | 9.85          | 83.34 | 1.077    | 9.45          |
| HCDs + 96 $\mu$ M TNP | 3.37          | 18.34 | 9.97          | 81.66 | 1.000    | 9.50          |

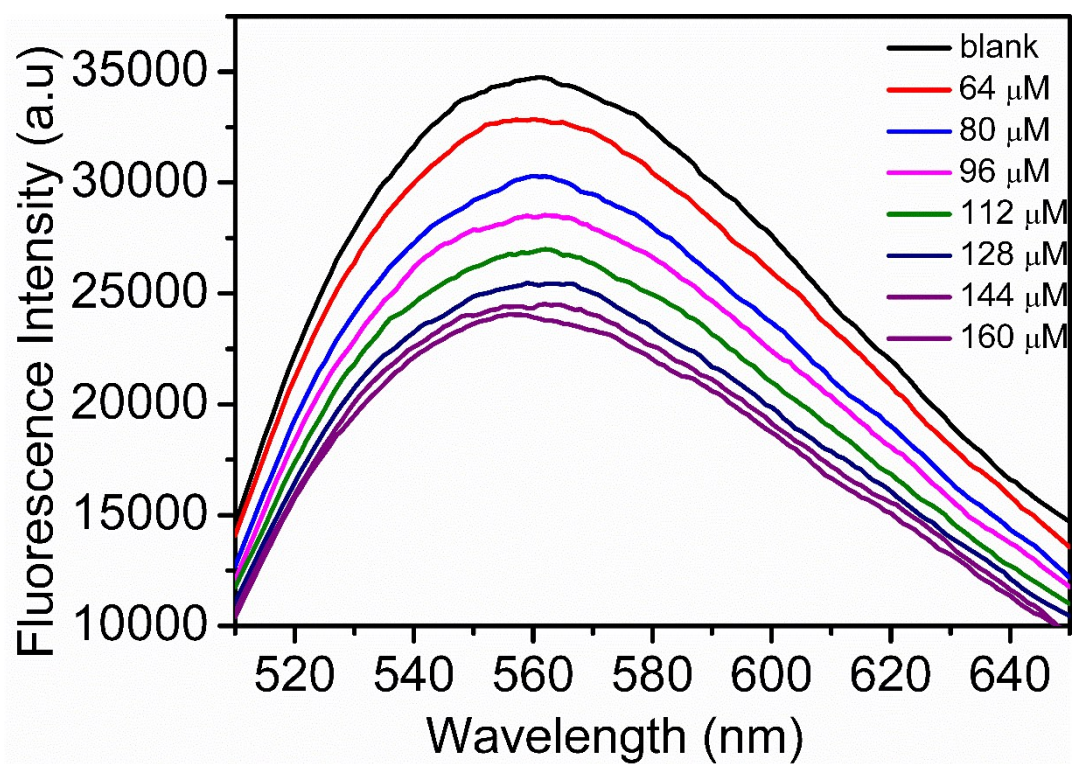

**Fig. S3** Emission spectra of the HCDs excited at 500 nm in the presence of various concentrations of TNP.

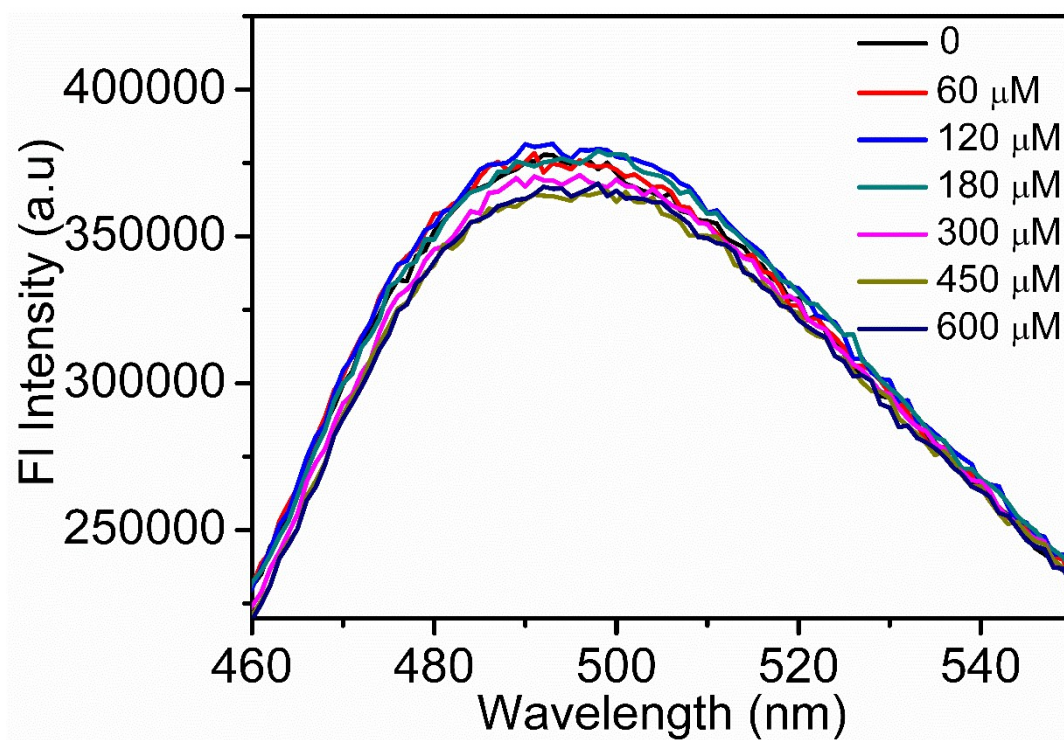

**Fig. S4** Emission spectra of HCDs in the presence of various concentrations of trifluoroacetic acid.



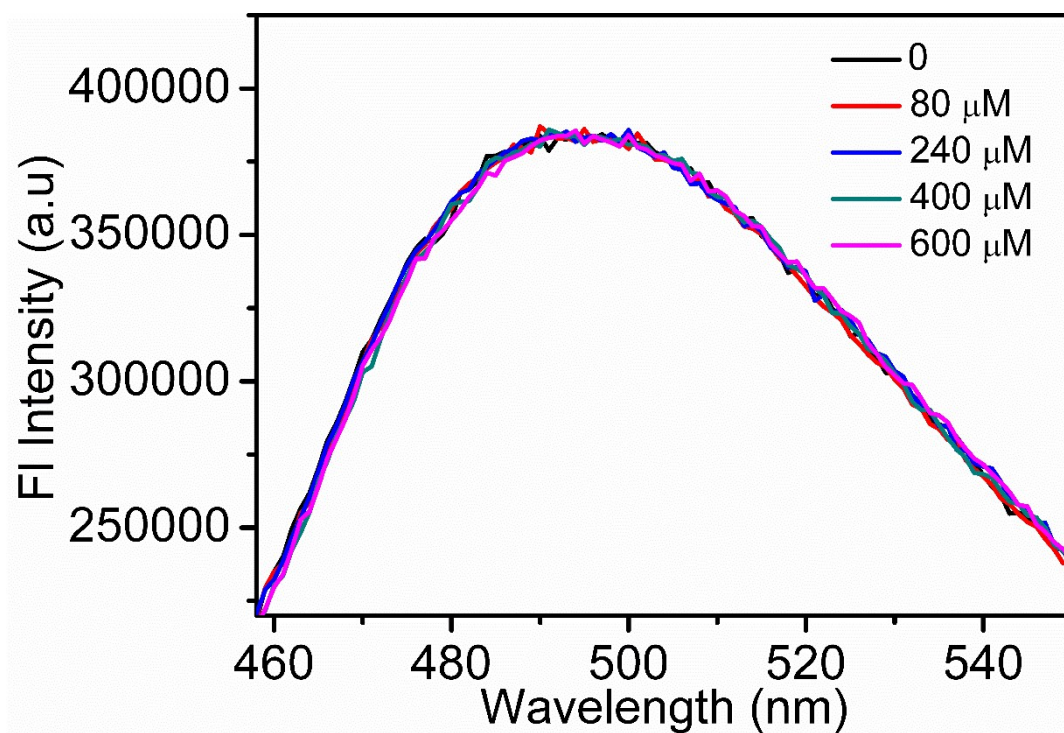

**Fig. S5** Emission spectra of HCDs in the presence of various concentrations of p-Toluenesulfonic acid.

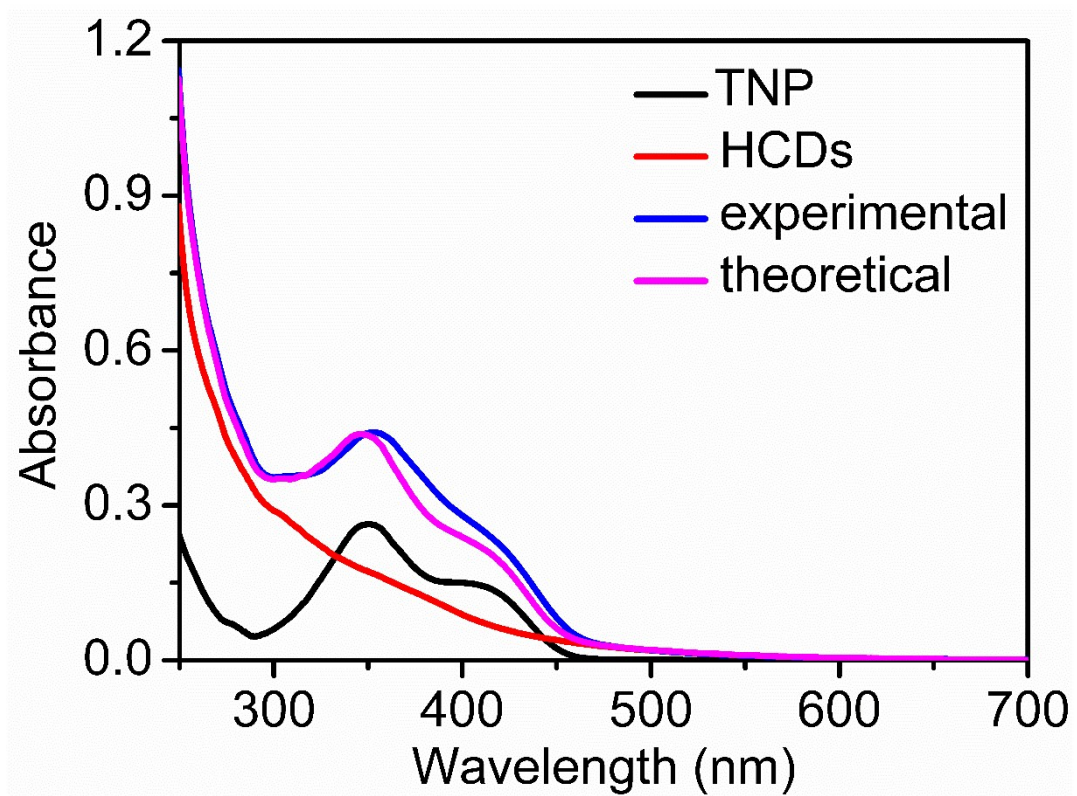

**Fig. S6** UV/Vis absorption spectra of the HCDs and TNP in THF, and the theoretical and experimental spectra of the sum of the HCDs and TNP.

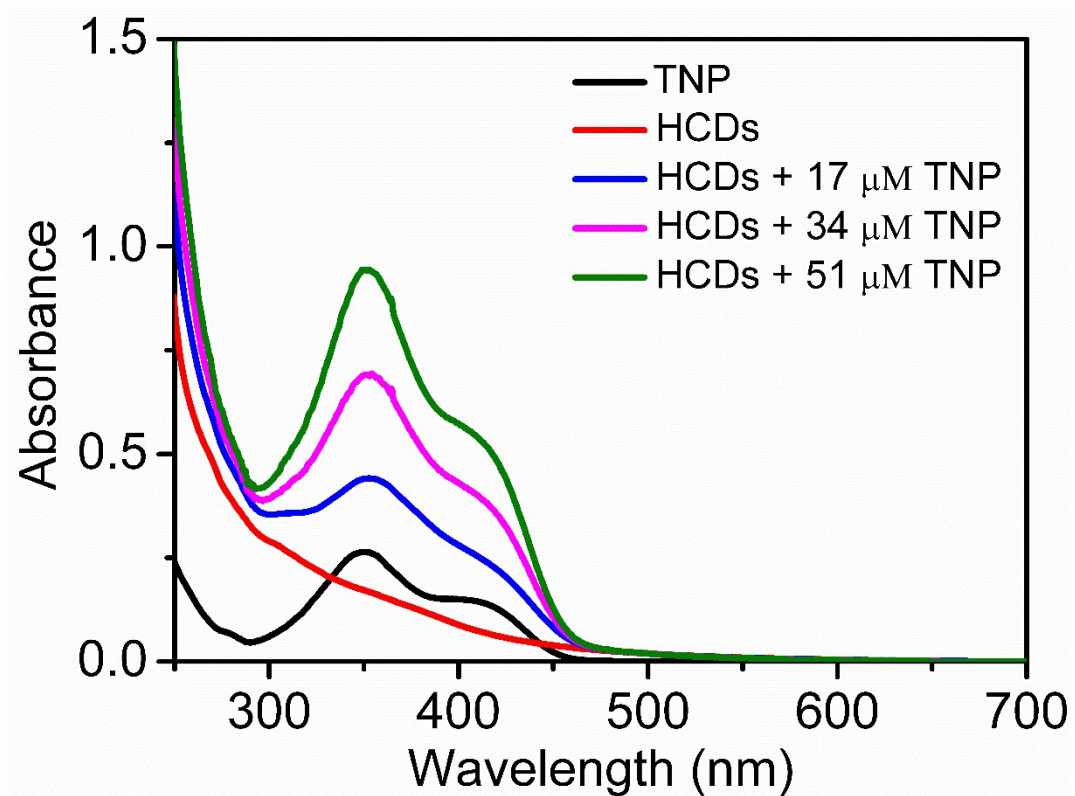

**Fig. S7** UV/Vis absorption spectra of the HCDs, TNP and the mixture with different concentrations of TNP.

## References

1. L. P. Lin, M. C. Rong, S. S. Lu, X. H. Song, Y. X. Zhong, J. W. Yan, Y. R. Wang and X. Chen, *Nanoscale*, 2015, **7**, 1872-1878.
2. M. C. Rong, L. P. Lin, X. H. Song, T. T. Zhao, Y. X. Zhong, J. W. Yan, Y. R. Wang and X. Chen, *Anal. Chem.*, 2015, **87**, 1288-1296.
3. Y. X. Ma, H. Li, S. Peng and L. Y. Wang, *Anal. Chem.*, 2012, **84**, 8415-8421.
4. Y. Wang and Y. N. Ni, *Anal. Chem.*, 2014, **86**, 7463-7470.
5. X. Deng and D. Wu, *RSC Adv.*, 2014, **4**, 42066-42070.
6. N. Venkatramaiah, S. Kumar and S. Patil, *Chem. Commun.*, 2012, **48**, 5007-5009.
7. J. Ma, T. T. Lin, X. Y. Pan and W. Z. Wang, *Chem. Mat.*, 2014, **26**, 4221-4229.
8. K. Acharyya and P. S. Mukherjee, *Chem. Commun.*, 2014, **50**, 15788-15791.
